# Supplementary material
Source: MDPI journal article supplement (https://www.mdpi.com/2227-9717/10/4/707)
Supplement: s1 [file s1]

# Isolation and analysis of carotenoids in Hungary from Zechmeister until today

Attila Agócs<sup>a</sup>, Erika Turcsi<sup>a</sup>, Veronika Nagy<sup>a</sup> and József Deli<sup>a,b\*</sup>

<sup>a</sup>Department of Biochemistry and Medical Chemistry, University of Pécs, Medical School, Szigeti u. 12, H-7624 Pécs, Hungary

<sup>b</sup>Department of Pharmacognosy, University of Pécs, Faculty of Pharmacy, Rókus u. 2, H-7624 Pécs, Hungary

\*Correspondence: jozsef.deli@aok.pte.hu

Figure S1. Structural formulas of some carotenoids

## Hydrocarbons

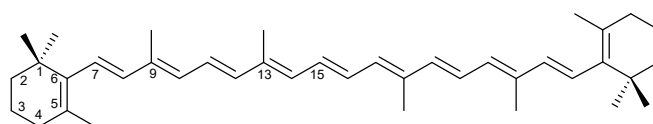

$\beta$ -Carotene

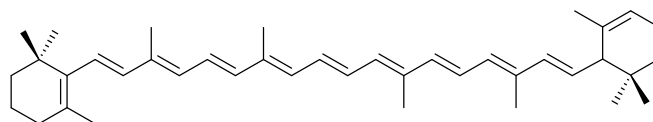

$\alpha$ -Carotene

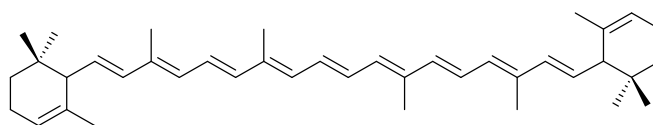

$\epsilon$ -Carotene

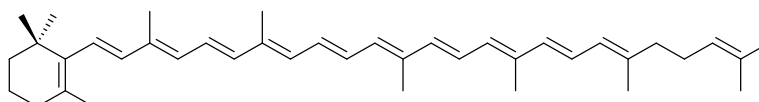

$\gamma$ -Carotene

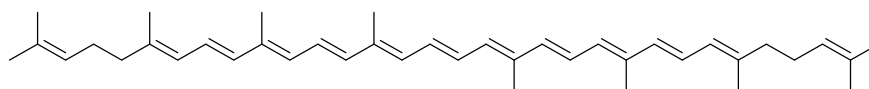

Lycopene

*Hydroxycarotenoids*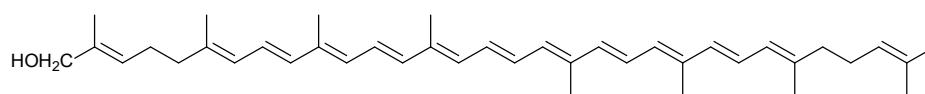

Lycopanthin

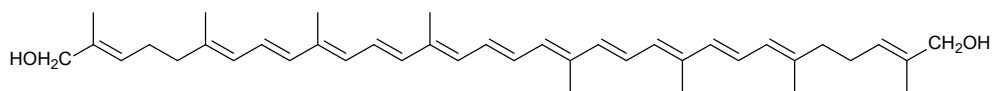

Lycophyll

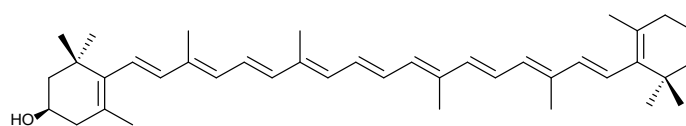 $\beta$ -Cryptoxanthin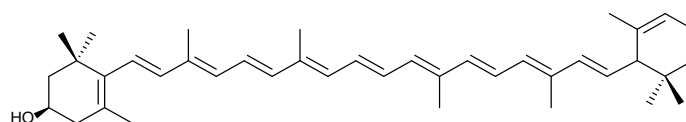 $\alpha$ -Cryptoxanthin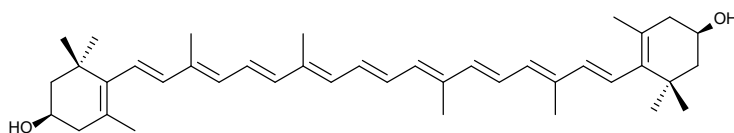

Zeaxanthin

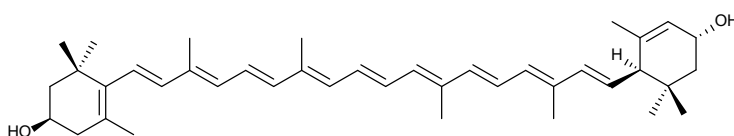

Lutein

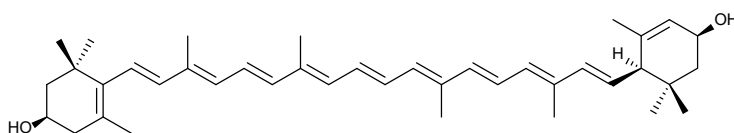

3'-Epilutein

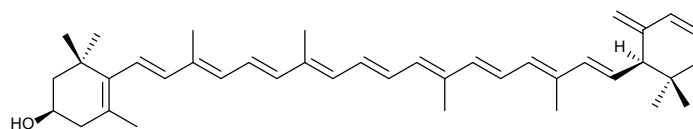

Anhydrolutein I

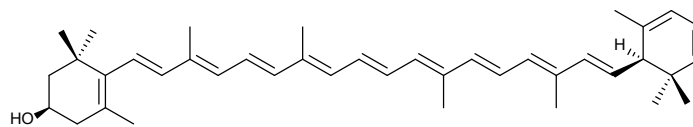

Anhydrolutein II

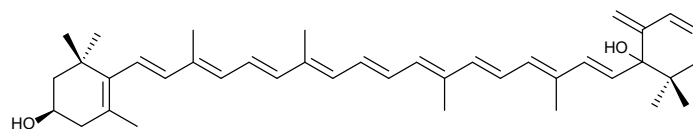

Nigroxanthin

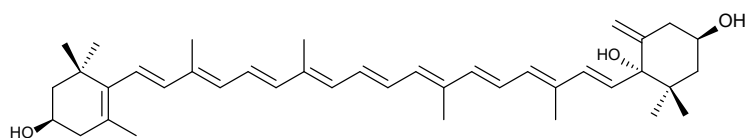

Prenigroxanthin

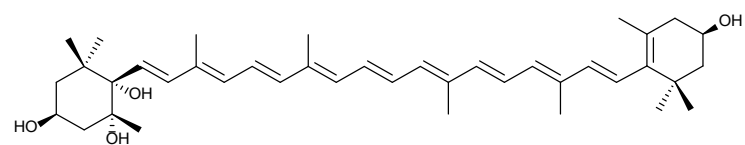

6-Epikarpoxanthin

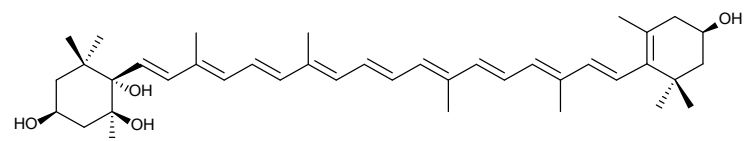

5,6-Diepikarpoxanthin

## Epoxycarotenoids

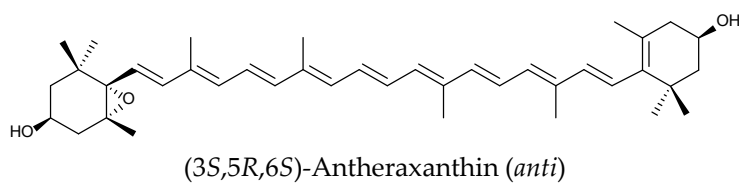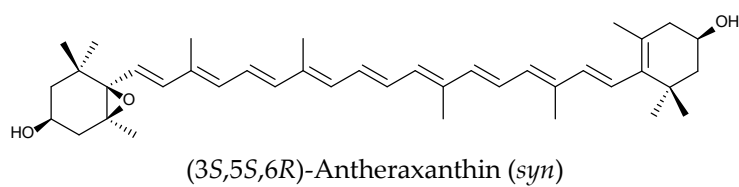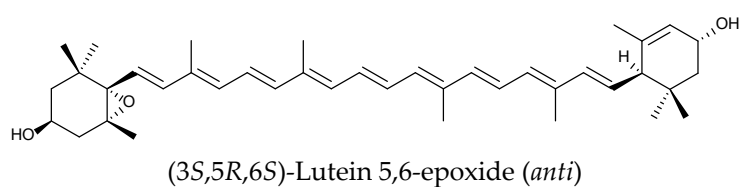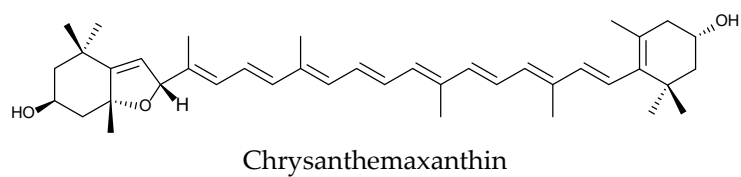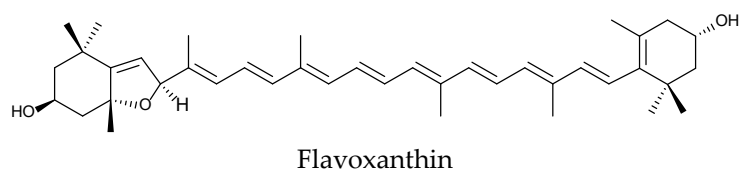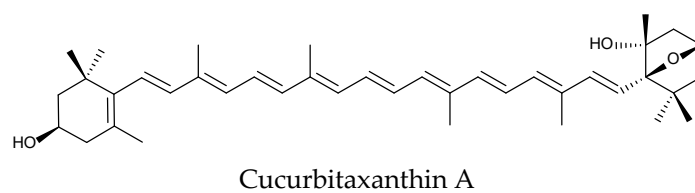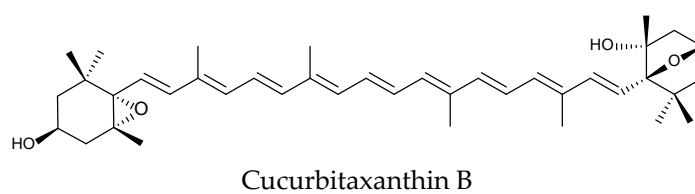

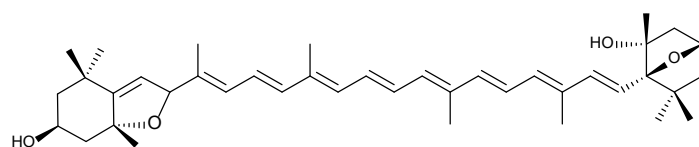

Cucurbitachrome

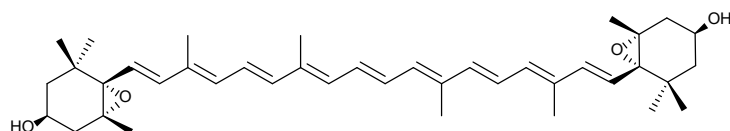(3S,5R,6S,3'S,5'R,6'S)-Violaxanthin (*anti,anti*)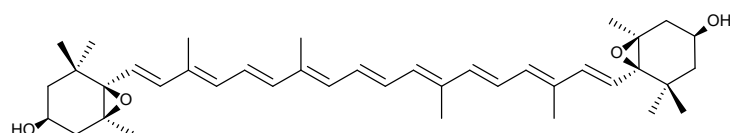(3S,5S,6R,3'S,5'S,6'R)-Violaxanthin (*syn,syn*)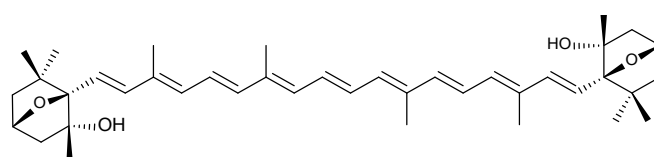

Cycloviolaxanthin

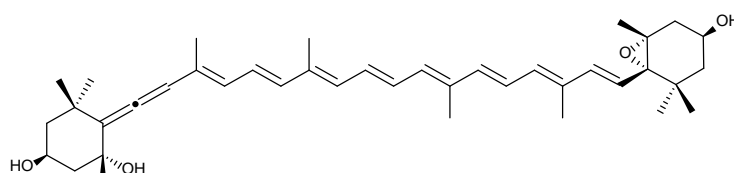(all-*E*)-Neoxanthin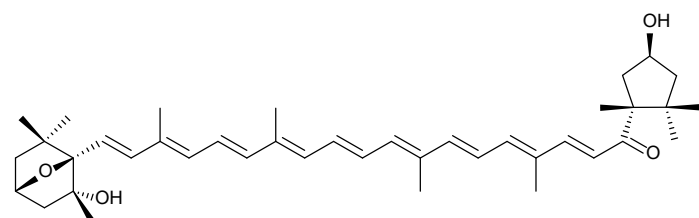

Capsanthin 3,6-epoxide

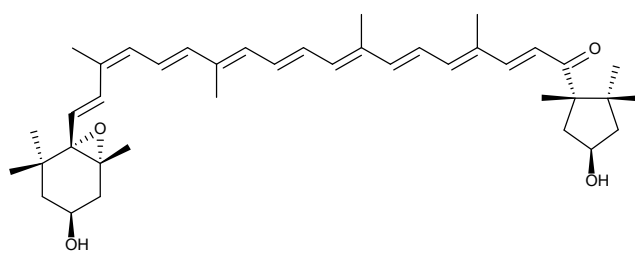

(9Z)-Capsanthin 5,6-epoxide

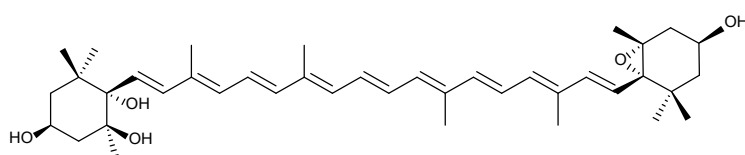

5,6-Diepilatoxanthin

*Ketocarotenoids*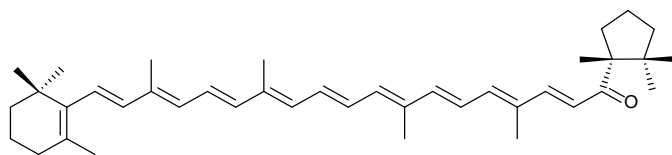

Sapotexanthin

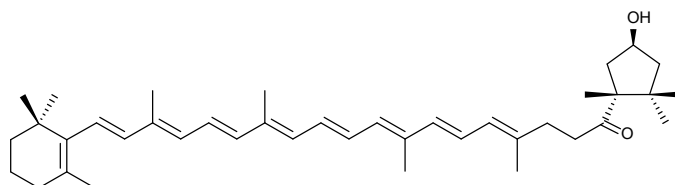

Cryptocapsin

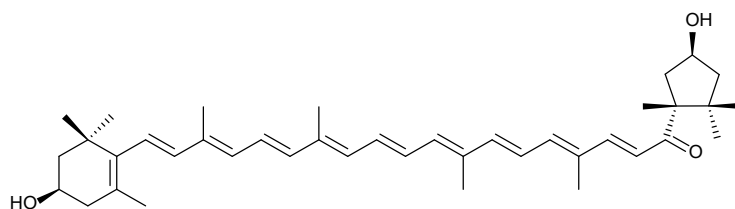

Capsanthin

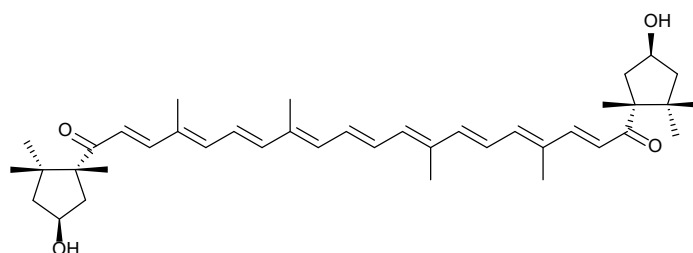

Capsorubin

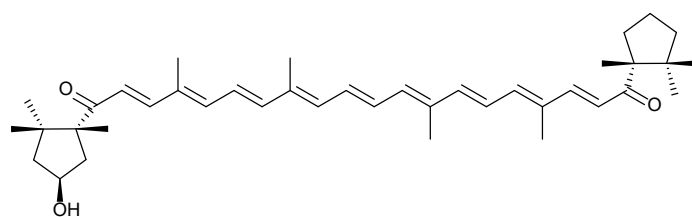

3'-Deoxycapsorubin

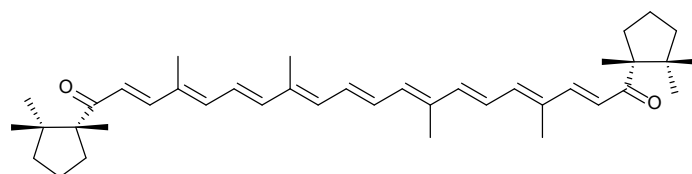

3,3'-Dideoxy-capsorubin

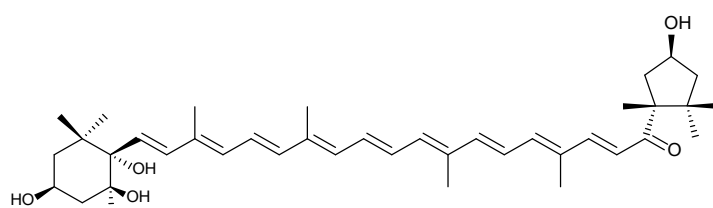

5,6-Diepicapsokarpoxanthin

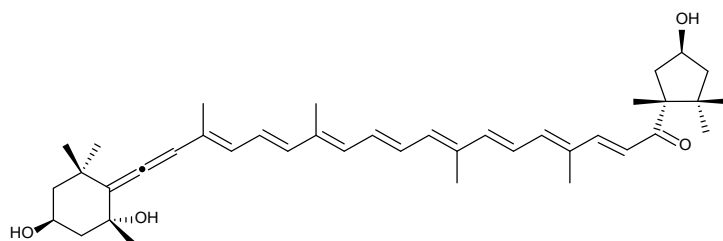

Capsoneoxanthin

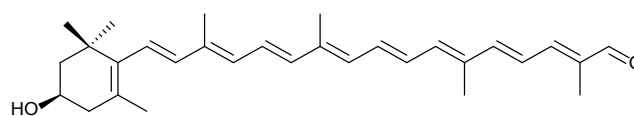 $\beta$ -Citraurin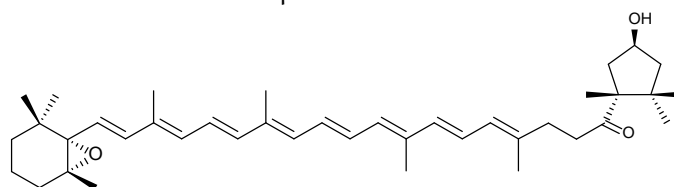

(5R,6S)-Cryptocapsin 5,6-epoxide

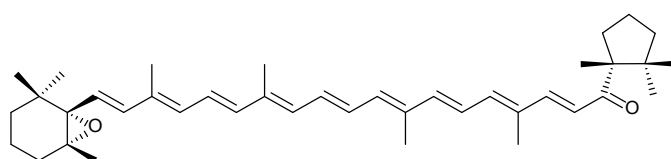

(5R,6S,5'R)-Sapotexanthin 5,6-epoxide
